# Supplementary material for: Health Status of Bycaught Common Eiders (Somateria mollissima) from the Western Baltic Sea
Source: MDPI journal article supplement (doi:10.3390/ani12152002), 2022-08-08
Supplement: s1 [file s1]

# Health Status of Bycaught Common Eiders (*Somateria mollissima*) from the Western Baltic Sea

Luca A. Schick <sup>1</sup>, Peter Wohlsein <sup>2</sup>, Silke Rautenschlein <sup>3</sup>, Arne Jung <sup>3</sup>, Joy Ometere Boyi <sup>1</sup>, Gildas Glemarec <sup>4</sup>, Anne-Mette Kroner <sup>4</sup>, Stefanie A. Barth <sup>5</sup> and Ursula Siebert <sup>1,\*</sup>

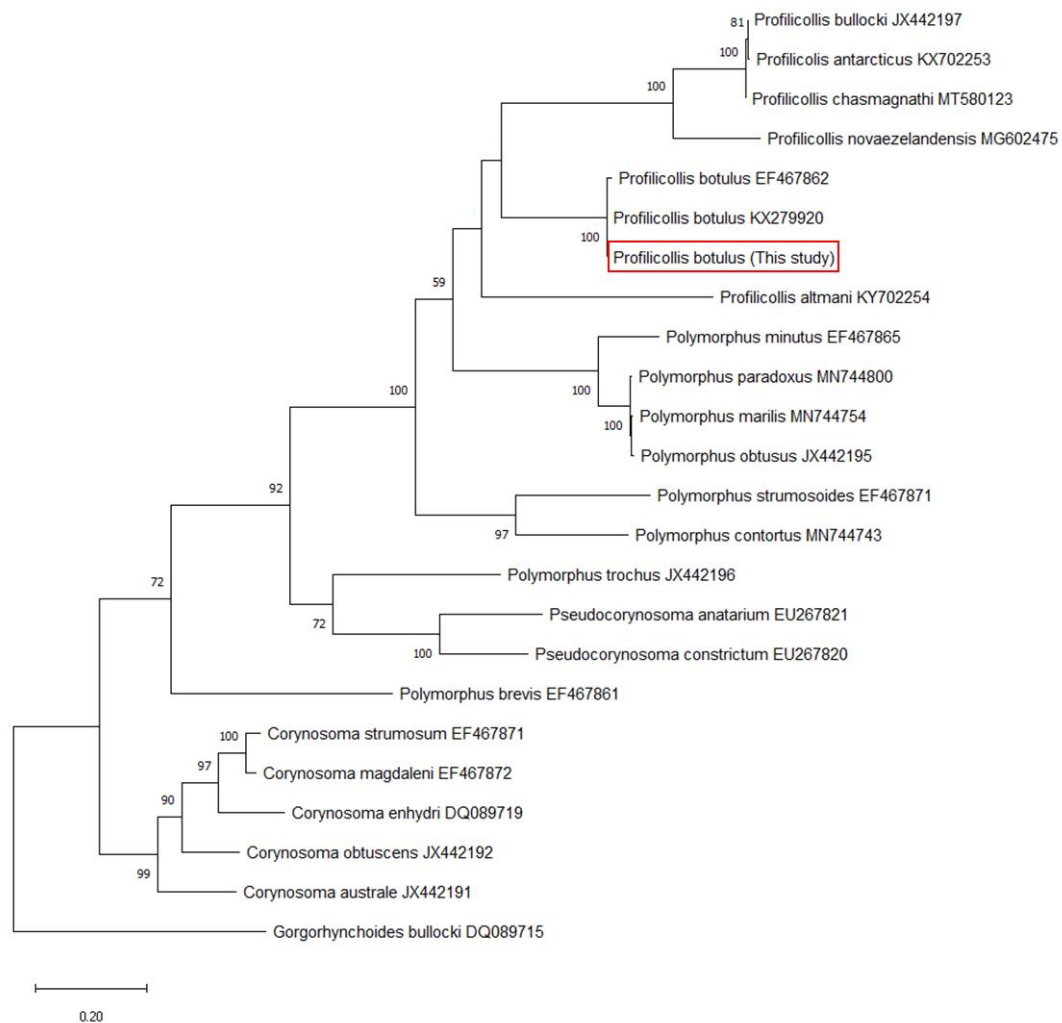

**Figure S1.** Maximum likelihood analysis of phylogenetic relationships of *Profilicollis botulus* in relation to other members of the Polymorphidae family using Cytochrome oxidase subunit I (COI) sequences. *Gorgorhynchoides bullocki* was designated as outgroup. Nodal support is indicated by bootstrap values ( $n = 1000$  bootstrap replicates), values below 50% are not shown. The sequence in the red box is from this study.
